# Supplementary material for: Systemic Endothelial Function, Plasma Xanthine Oxidoreductase Activity, and Blood Pressure Variability in Patients with Stable Coronary Artery Disease
Source: MDPI journal article supplement (doi:10.3390/medicina58101423), 2022-10-10
Supplement: s1 [file s1]

**Table S1. Baseline characteristics between the 2 original studies**

| Variable                             | Study #1<br>(n=68) | Study #2<br>(n=38) | p value |
|--------------------------------------|--------------------|--------------------|---------|
| Age (years)                          | 70.3±10.8          | 70.7±8.7           | 0.86    |
| Men                                  | 58 (85.3%)         | 31 (81.6%)         | 0.78    |
| Body mass index (kg/m <sup>2</sup> ) | 24.3±3.8           | 24.8±3.1           | 0.55    |
| Hypertension                         | 46 (67.7%)         | 27 (71.1%)         | 0.83    |
| Diabetes                             | 31 (45.6%)         | 17 (44.7%)         | 1.00    |
| Dyslipidemia                         | 48 (70.6%)         | 34 (89.5%)         | 0.03    |
| Current smoker                       | 12 (17.7%)         | 3 (7.9%)           | 0.25    |
| Prior myocardial infarction          | 18 (26.5%)         | 11 (29.0%)         | 0.83    |
| eGFR (ml/min/1.73 m <sup>2</sup> )   | 71.5±17.8          | 67.8±15.4          | 0.29    |
| Serum uric acid (mg/dl)              | 5.5±1.5            | 5.4±1.2            | 0.51    |
| Log-XOR activity                     | 1.65±0.40          | 1.68±0.33          | 0.72    |
| Hypoxanthine (μM)                    | 4.32±1.68          | 4.52±1.66          | 0.55    |
| Xanthine (μM)                        | 0.56±0.24          | 1.08±1.55          | 0.007   |
| LDL cholesterol (mg/dl)              | 92.4±26.3          | 82.7±19.5          | 0.050   |
| HDL cholesterol (mg/dl)              | 51.9±16.4          | 53.0±12.4          | 0.73    |
| Non-fasting triglyceride (mg/dl)     | 139.6±65.5         | 155.2±83.5         | 0.29    |
| Medical treatment                    |                    |                    |         |
| ACE-I or ARB                         | 33 (48.5%)         | 24 (63.2%)         | 0.16    |
| β-blocker                            | 27 (39.7%)         | 12 (31.6%)         | 0.53    |
| Calcium channel blocker              | 31 (45.6%)         | 14 (36.8%)         | 0.42    |
| Diuretic                             | 9 (13.2%)          | 6 (15.8%)          | 0.77    |
| Statin                               | 58 (85.3%)         | 38 (100%)          | 0.01    |
| Oral hypoglycemic agent              | 28 (41.2%)         | 12 (31.6%)         | 0.41    |
| Reactive hyperemia index             | 1.86±0.52          | 1.85±0.63          | 0.89    |

*ACE-I* angiotensin converting enzyme inhibitor; *ARB* angiotensin II receptor blocker; *eGFR* estimate glomerular filtration rate; *HDL* high density lipoprotein; *LDL* low density lipoprotein; *RHI* reactive hyperemia index; *XOR* xanthine oxidoreductase.
